# Supplementary material
Source: publisher site journal article supplement (https://www.spandidos-publications.com/4160/downloadSupplementary)
Supplement: Supplementary file 1 [file downloadSupplementary]

Figure S1. Detection of adoptively transferred CAR-modified T cells by FC. Samples of peripheral blood were obtained from the subject with the unique patient number 010 on days 10 and 14 after axicabtagene ciloleucel therapy. Aliquots of peripheral blood mononuclear cells were stained with fluorochrome-conjugated antibodies specific for CD45 and CD3 and a CAR detection reagent. Samples were examined by FC and data were analyzed using FlowJo software. Complete blood counts were obtained from an accredited clinical laboratory at the UKE medical university center. ANC, absolute neutrophil count; dPCR, digital droplet PCR; Lympho/Ly, lymphocytes; Mono/Mo, monocytes; WBC, white blood cells; CAR, chimeric antigen receptor; FSC-A, forward scatter-absorbance; SSC-A, side scatter-absorbance; FC, flow cytometry.

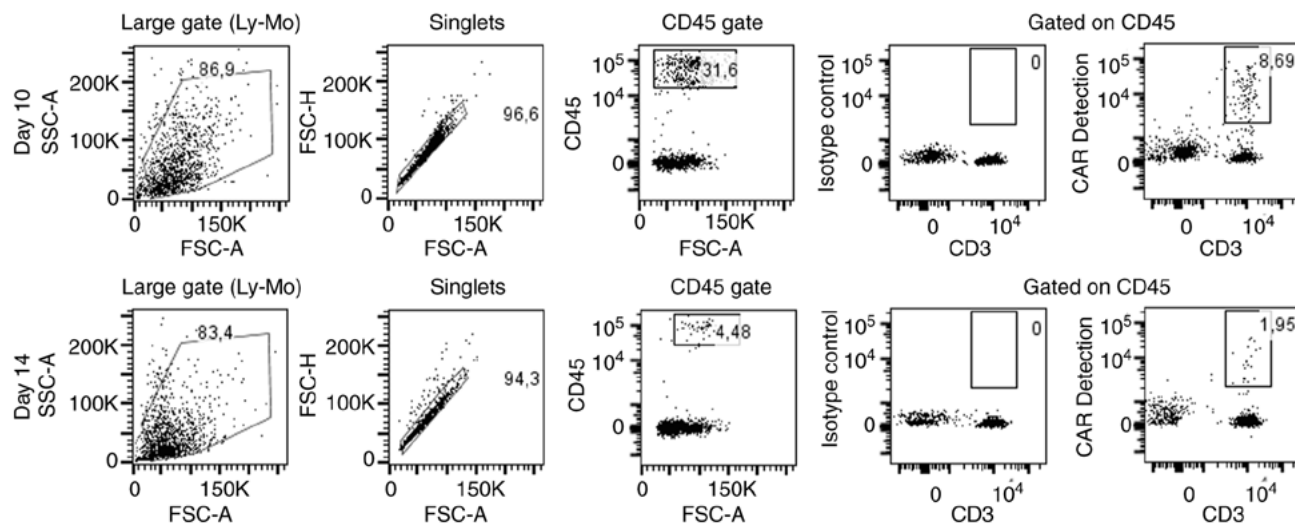

| Day post-infusion | dPCR         | Complete blood count |                     |                     |                     |               | Flow cytometry       |              |
|-------------------|--------------|----------------------|---------------------|---------------------|---------------------|---------------|----------------------|--------------|
|                   | CAR-T cell   | WBC                  | ANC                 | Lympho              | Mono                | Lympho & Mono | CAR-T Cell in (CD45) |              |
|                   | abs/ $\mu$ l | $\times 10^3/\mu$ l  | $\times 10^3/\mu$ l | $\times 10^3/\mu$ l | $\times 10^3/\mu$ l | abs/ $\mu$ l  | %                    | abs/ $\mu$ l |
| 10                | 114.06       | 2.20                 | 0.25                | 0.88                | 0.37                | 1250          | 8.69                 | 108.63       |
| 14                | 9.16         | 1.30                 | 0.31                | 0.47                | 0.25                | 720           | 1.95                 | 14.04        |
